# Supplementary material
Source: PubMed Central journal article supplement (PMC4997948)
Supplement: CAR-12-814-SD1.pdf [file CAR-12-814-SD1.pdf]

## Supplementary Materials

### Identification of Small Molecule Inhibitors of Tau Aggregation by Targeting Monomeric Tau As a Potential Therapeutic Approach for Tauopathies

Marcus Pickhardt<sup>1</sup>, Thomas Neumann<sup>2</sup>, Daniel Schwizer<sup>2</sup>, Kari Callaway<sup>3</sup>, Michele Vendruscolo<sup>4</sup>, Dale Schenk<sup>3,5</sup>, Peter St. George-Hyslop<sup>6,7</sup>, Eva M. Mandelkow<sup>1,8,9</sup>, Christopher M. Dobson<sup>10</sup>, Lisa McConlogue<sup>3,11</sup>, Eckhard Mandelkow<sup>1,8,9,\*</sup> and Gergely Tóth<sup>10,11,\*</sup>

<sup>1</sup>Deutsches Zentrum für Neurodegenerative Erkrankungen (DZNE), Ludwig-Erhard-Allee 2, 53175 Bonn, Germany; <sup>2</sup>Graffinity Pharmaceuticals, now NovAliX SAS, BioParc, 850 bld Sébastien Brant BP 30170 F-67405 Illkirch Cedex, France; <sup>3</sup>Elan Pharmaceuticals, 700 Gateway Boulevard, South San Francisco, CA 94080, USA; <sup>4</sup>Department of Chemistry, University of Cambridge, Lensfield Road, Cambridge CB2 1EW, UK; <sup>5</sup>Prothena Biosciences, South San Francisco, CA, USA; <sup>6</sup>Department of Clinical Neurosciences, University of Cambridge, Cambridge Institute for Medical Research, Addenbrooke's Hospital, Hills Road, Cambridge, CB2 0XY, United Kingdom; <sup>7</sup>Tanz Centre for Research in Neurodegenerative Diseases, University of Toronto, 6<sup>th</sup> Floor Krembil Discovery Tower, 60 Leonard Avenue, 6<sup>th</sup> Floor, 6KD417, Toronto, Ontario, M5T 2S8; <sup>8</sup>Max Planck Institute for Metabolism Research, Hamburg Outstation, c/o Deutsches Elektronen Synchrotron, Hamburg, Germany; <sup>9</sup>CAESAR Research Center/MPG, Ludwig-Erhard-Allee 2, 53175 Bonn, Germany; <sup>10</sup>Department of Clinical Neurosciences, Wolfson Brain Imaging Center, University of Cambridge, Addenbrooke's Hospital, Cambridge, CB2 0QQ, United Kingdom; <sup>11</sup>MTA-TTK-NAP B - Drug Discovery Research Group – Neurodegenerative Diseases, Institute of Organic Chemistry, Research Center for Natural Sciences, Hungarian Academy of Sciences, Budapest, Hungary

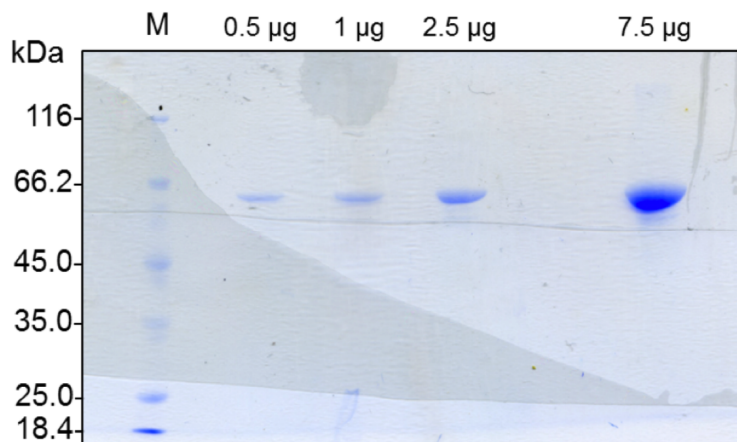

**Fig. (S1).** HTau<sup>2N4R</sup>wt stock preparation, used as starting material for the screen, showing that the protein was monomeric. 10% SDS-PAGE of hTau<sup>2N4R</sup>wt stock prepared in PBS buffer at pH 7.4 with 1 mM DTT at 1 mg/ml (22 μM) concentration. hTau<sup>2N4R</sup>wt appears as a single band by Coomassie Blue staining. The purity of the protein is > 95%.

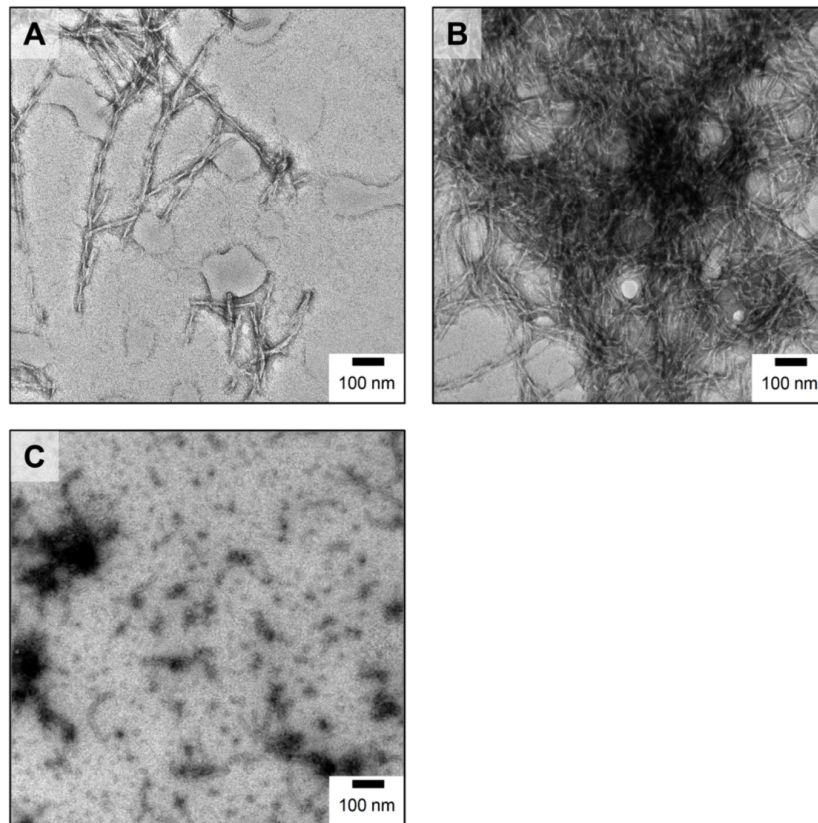

**Fig. (S2).** Electron micrographs of Tau<sup>4RD</sup>ΔK280 fibrils after 10 days of incubation. **A** and **B** – without compound; **C** – in the presence of anti-aggregation compound (10 μM Tau protein + 60 μM bb14<sup>[34]</sup> after 12 hours incubation at 37 °C).

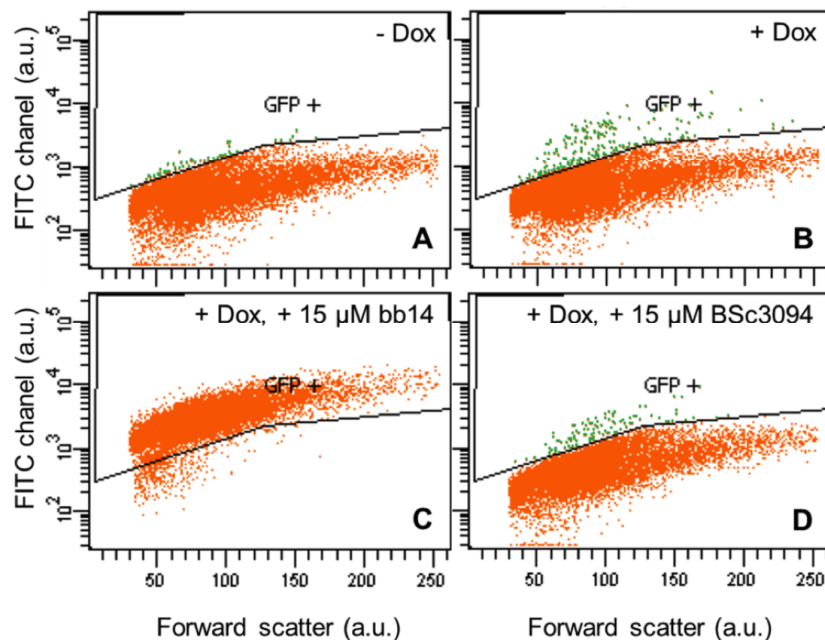

**Fig. (S3).** Comparison of tau expressing N2a cells when treated with anti-aggregation compounds. N2a cells expressing the tau construct Tau<sup>4RD</sup>ΔK280 were incubated with the rhodanine derivative bb14<sup>[34]</sup> and the phenyl-thiazolyl-hydrazide derivative BSc3094<sup>[35]</sup> (15 μM concentration in the medium) for 4 days and the amount of ThS-positive cells was analyzed by FACS. The induced cells without compounds shows an amount of ThS-positive cells (located in the “GFP+”-field) which decreases in the presence of BSc3094 (compare B and D). In the samples treated with bb14 we observed a general upward shift of the whole cell population in the FITC channel. This observation suggests an artificial fluorescence effect of this compound in our cellular system. Because of this we used only the BSc3094 compound as reference for our cellular assays (FACS and MTT).
